# Supplementary material for: Role of Cardiac AMP-Activated Protein Kinase in a Non-pathological Setting: Evidence From Cardiomyocyte-Specific, Inducible AMP-Activated Protein Kinase α1α2-Knockout Mice
Source: PubMed Central journal article supplement (PMC8558539; doi:10.3389/fcell.2021.731015), 2021-10-18

## Supplementary Material

### Supplementary Figures and Tables

#### Supplementary Table 1. Cardiac function measured by echocardiography before and after KO induction by tamoxifen.

|                   | - 1 w          |                |                      | 10 w           |                |                      | 52 w           |                |                      | 2-way RM Anova   |                   |                         |
|-------------------|----------------|----------------|----------------------|----------------|----------------|----------------------|----------------|----------------|----------------------|------------------|-------------------|-------------------------|
|                   | C              | KO             | P <sub>KO vs C</sub> | C              | KO             | P <sub>KO vs C</sub> | C              | KO             | P <sub>KO vs C</sub> | P <sub>Gen</sub> | P <sub>Time</sub> | P <sub>Gen x Time</sub> |
| AoV VTI (mm)      | 41.88 ± 2.15   | 41.69 ± 2.00   | 0.965                | 35.99 ± 2.82   | 39.96 ± 4.32   | 0.359                | 31.43 ± 1.64   | 38.33 ± 2.96   | 0.177                | 0.326            | <b>0.026</b>      | 0.326                   |
| LVOT (mm)         | 1.19 ± 0.02    | 1.18 ± 0.02    | 0.647                | 1.27 ± 0.02    | 1.27 ± 0.01    | 0.903                | 1.30 ± 0.03    | 1.30 ± 0.02    | 0.921                | 0.930            | <b>&lt; 0.001</b> | 0.801                   |
| HR t0 (BPM)       | 450.20 ± 9.00  | 460.50 ± 9.90  |                      | 471.55 ± 9.32  | 480.31 ± 15.36 |                      | 463.89 ± 16.35 | 456.77 ± 11.71 |                      | 0.656            | 0.194             | 0.848                   |
| HR tend (BPM)     | 413.55 ± 15.34 | 412.38 ± 11.20 | 0.955                | 465.45 ± 13.36 | 460.88 ± 19.50 | 0.826                | 418.89 ± 15.73 | 372.77 ± 8.82  | 0.052                | 0.250            | <b>&lt; 0.001</b> | 0.194                   |
| IVCT (ms)         | 18.81 ± 2.05   | 20.57 ± 2.08   |                      | 15.07 ± 1.46   | 15.94 ± 1.33   |                      | 17.61 ± 0.97   | 20.22 ± 1.82   |                      | 0.333            | 0.146             | 0.928                   |
| IVRT (ms)         | 17.29 ± 0.69   | 16.73 ± 1.28   | 0.960                | 15.12 ± 0.87   | 16.31 ± 0.99   | 0.578                | 18.37 ± 1.22   | 22.89 ± 1.15   | 0.009                | 0.078            | <b>0.004</b>      | 0.113                   |
| MV A (mm/s)       | 419.50 ± 34.47 | 382.40 ± 26.52 | 0.398                | 355.18 ± 28.98 | 345.61 ± 29.81 | 0.827                | 328.00 ± 48.78 | 303.80 ± 24.04 | 0.347                | 0.316            | <b>0.031</b>      | 0.793                   |
| MV E (mm/s)       | 604.92 ± 47.58 | 586.82 ± 35.44 | 0.734                | 521.10 ± 24.59 | 522.93 ± 36.70 | 0.937                | 483.53 ± 39.96 | 468.82 ± 38.34 | 0.694                | 0.737            | <b>0.003</b>      | 0.917                   |
| MV E/A            | 1.48 ± 0.08    | 1.58 ± 0.08    |                      | 1.39 ± 0.09    | 1.60 ± 0.09    |                      | 1.65 ± 0.17    | 1.58 ± 0.10    |                      | 0.229            | 0.649             | 0.621                   |
| LVPA;d (mm)       | 0.69 ± 0.04    | 0.67 ± 0.03    | 0.573                | 0.77 ± 0.03    | 0.74 ± 0.02    | 0.414                | 0.81 ± 0.04    | 0.79 ± 0.02    | 0.353                | 0.296            | <b>&lt; 0.001</b> | 0.914                   |
| LVPA;s (mm)       | 1.04 ± 0.05    | 1.01 ± 0.05    | 0.652                | 1.22 ± 0.05    | 1.16 ± 0.05    | 0.335                | 1.18 ± 0.07    | 1.18 ± 0.03    | 0.768                | 0.462            | <b>&lt; 0.001</b> | 0.841                   |
| LVID;d (mm)       | 4.02 ± 0.09    | 4.05 ± 0.08    |                      | 3.94 ± 0.07    | 3.91 ± 0.08    |                      | 4.12 ± 0.15    | 4.10 ± 0.08    |                      | 0.962            | 0.331             | 0.919                   |
| LVID;s (mm)       | 2.92 ± 0.10    | 2.98 ± 0.10    | 0.656                | 2.53 ± 0.10    | 2.63 ± 0.08    | 0.455                | 2.95 ± 0.11    | 2.90 ± 0.08    | 0.850                | 0.651            | <b>&lt; 0.001</b> | 0.770                   |
| LVPW;d (mm)       | 0.72 ± 0.02    | 0.68 ± 0.03    |                      | 0.84 ± 0.03    | 0.87 ± 0.03    |                      | 0.94 ± 0.06    | 0.92 ± 0.02    |                      | 0.700            | <b>&lt; 0.001</b> | 0.407                   |
| LVPW;s (mm)       | 1.14 ± 0.05    | 1.00 ± 0.03    | <b>0.013</b>         | 1.24 ± 0.04    | 1.27 ± 0.04    | 0.626                | 1.31 ± 0.05    | 1.31 ± 0.03    | 0.948                | 0.313            | <b>&lt; 0.001</b> | <b>0.054</b>            |
| EF (%)            | 53.90 ± 1.87   | 52.22 ± 2.37   | 0.570                | 65.96 ± 2.08   | 61.53 ± 1.94   | 0.137                | 54.61 ± 2.38   | 56.65 ± 1.65   | 0.633                | 0.511            | <b>&lt; 0.001</b> | 0.267                   |
| FS (%)            | 27.58 ± 1.19   | 26.70 ± 1.51   | 0.663                | 36.09 ± 1.65   | 32.80 ± 1.36   | 0.105                | 28.15 ± 1.57   | 29.44 ± 1.13   | 0.688                | 0.481            | <b>&lt; 0.001</b> | 0.248                   |
| LV Mass (mg)      | 99.57 ± 2.60   | 95.41 ± 4.03   | 0.477                | 115.60 ± 3.53  | 113.76 ± 3.37  | 0.753                | 137.86 ± 7.01  | 134.11 ± 4.56  | 0.427                | 0.352            | <b>&lt; 0.001</b> | 0.902                   |
| LV Mass corr (mg) | 79.66 ± 2.08   | 76.32 ± 3.23   | 0.639                | 92.48 ± 2.83   | 91.01 ± 2.70   | 0.371                | 110.29 ± 5.61  | 107.29 ± 3.65  | 0.404                | 0.284            | <b>&lt; 0.001</b> | 0.973                   |
| LV/BW (mg/g)      | 3.28 ± 0.08    | 3.16 ± 0.10    | 0.671                | 2.98 ± 0.10    | 3.00 ± 0.11    | 0.435                | 2.55 ± 0.17    | 2.53 ± 0.12    | 0.961                | 0.644            | <b>&lt; 0.001</b> | 0.788                   |
| LV Vol;d (μL)     | 71.22 ± 3.57   | 72.52 ± 3.15   |                      | 68.02 ± 2.92   | 66.78 ± 3.09   |                      | 75.84 ± 5.66   | 74.66 ± 3.23   |                      | 0.952            | 0.282             | 0.921                   |
| LV Vol;s (μL)     | 33.26 ± 2.76   | 35.36 ± 2.88   | 0.550                | 23.56 ± 2.15   | 25.96 ± 1.95   | 0.495                | 34.17 ± 3.04   | 32.56 ± 2.08   | 0.764                | 0.662            | <b>&lt; 0.001</b> | 0.715                   |
| AoV SV (μL)       | 46.46 ± 1.93   | 45.94 ± 2.26   |                      | 45.18 ± 3.01   | 50.82 ± 5.49   |                      | 40.35 ± 3.43   | 50.87 ± 3.43   |                      | 0.189            | 0.746             | 0.294                   |
| AoV CO (mL/min)   | 19.08 ± 0.85   | 18.83 ± 1.05   |                      | 21.13 ± 1.76   | 24.00 ± 3.70   |                      | 16.87 ± 1.46   | 18.95 ± 1.31   |                      | 0.518            | 0.078             | 0.709                   |

Data are presented as Mean±SEM (N=11 Control, 16 KO) and analysed by 2-way Repeated Measure Anova followed by Holm-Sidak test.

A value of P or p<0.05 (for interaction P<0.1) was considered statistically significant (in bold).

Highlighted in grey, data with significant effect of time.

#### The detailed description of abbreviations, measurements and calculations:

##### AoV Flow, ascending aorta view

AoV VTI, Aorta velocity time integral, PW Doppler  
 LVOT, Left ventricular outflow tract length, B-mode  
 HR, heart rate, ECG

##### MV Flow, 4-chambers view, mitral valve

IVCT, Isovolumic contraction time, PW Doppler  
 IVRT, Isovolumic relaxation time, PW Doppler  
 MV A, Mitral valve A (atrial) velocity, PW Doppler  
 MV E, Mitral valve E (early) velocity, PW Doppler

##### Calculation

MV E/A, Mitral valve E/A ratio, MV E / MV A

##### SAX M-Mode, small axis view

LVAW;d, Inter-ventricular anterior wall (diastole), M-Mode  
 LVAW;s, Inter-ventricular anterior wall (systole), M-Mode  
 LVID;d, Left ventricular internal diameter (diastole), M-Mode  
 LVID;s, Left ventricular internal diameter (systole), M-Mode  
 LVPW;d, Left ventricular posterior wall (diastole), M-Mode  
 LVPW;s, Left ventricular posterior wall (systole), M-Mode

##### Calculation

EF, LV ejection fraction,  $100 \times ((LV\ Vol;d - LV\ Vol;s) / LV\ Vol;d)$   
 FS, LV fractional shortening,  $100 \times ((LVID;d - LVID;s) / LVID;d)$   
 LV Mass (mg), LV mass uncorrected,  $1.053 \times ((LVID;d + LVPW;d + IVS;d)^3 - LVID;d^3)$   
 LV Mass corr (mg), LV mass corrected, LV mass \* 0.8  
 LV/BW (mg/g), LV mass corrected for body weight, LV mass corrected/BW  
 LV Vol;d, Left Ventricle volume diastole,  $((7.0 / (2.4 + LVID;d)) \times LVID;d^3)$   
 LV Vol;s, Left Ventricle volume systole,  $((7.0 / (2.4 + LVID;s)) \times LVID;s^3)$   
 Ao SV, Stroke volume,  $(\pi/4) \times LVOT^2 \times AoV\ VTI$   
 Ao CO, Cardiac output,  $(AoV\ SV \times HR) / 1000$

**Supplementary Table 2. Weight of liver, kidneys and spleen 52 weeks after KO induction by tamoxifen.**

|                 | <b>C</b>      | <b>KO</b>     | <b>P<sub>KO vs C</sub></b> |
|-----------------|---------------|---------------|----------------------------|
| Body weight (g) | 43.16 ± 2.86  | 43.48 ± 1.81  | 0.920                      |
| Liver (g)       | 1.819 ± 0.137 | 1.921 ± 0.097 | 0.541                      |
| Kidneys (g)     | 0.433 ± 0.015 | 0.461 ± 0.014 | 0.204                      |
| Spleen (g)      | 0.079 ± 0.003 | 0.084 ± 0.006 | 0.466                      |

Data are presented as mean ± SEM (n=8 Control, 10 KO) and analysed by Student's t-test. A value of P<0.05 was considered statistically significant.

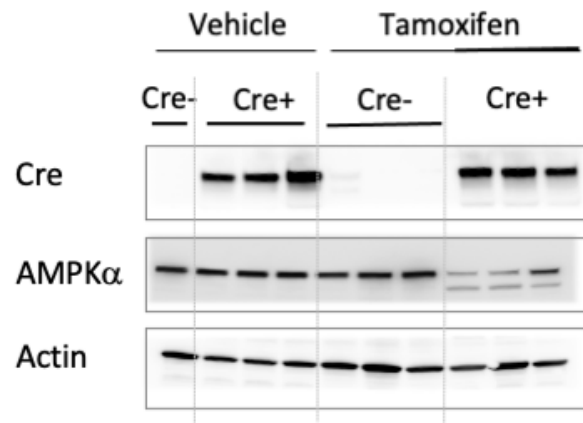

**Supplementary Figure 1.** Tamoxifen-inducible and Cre-mediated deletion of AMPK  $\alpha$  ( $\alpha 1 + \alpha 2$ ) analyzed by Western blot in AMPK $\alpha 1$ (fl/fl)AMPK $\alpha 2$ (fl/fl) (Cre-) and AMPK $\alpha 1$ (fl/fl)AMPK $\alpha 2$ (fl/fl) ( $\alpha$  MHC)-MerCreMer (Cre+) mice 2 weeks after tamoxifen or vehicle administration.

**Supplementary Figure 2.** Loading controls (Ponceau stainings and tubulin immunoblots) for Figures 2A, 2B and 2D.

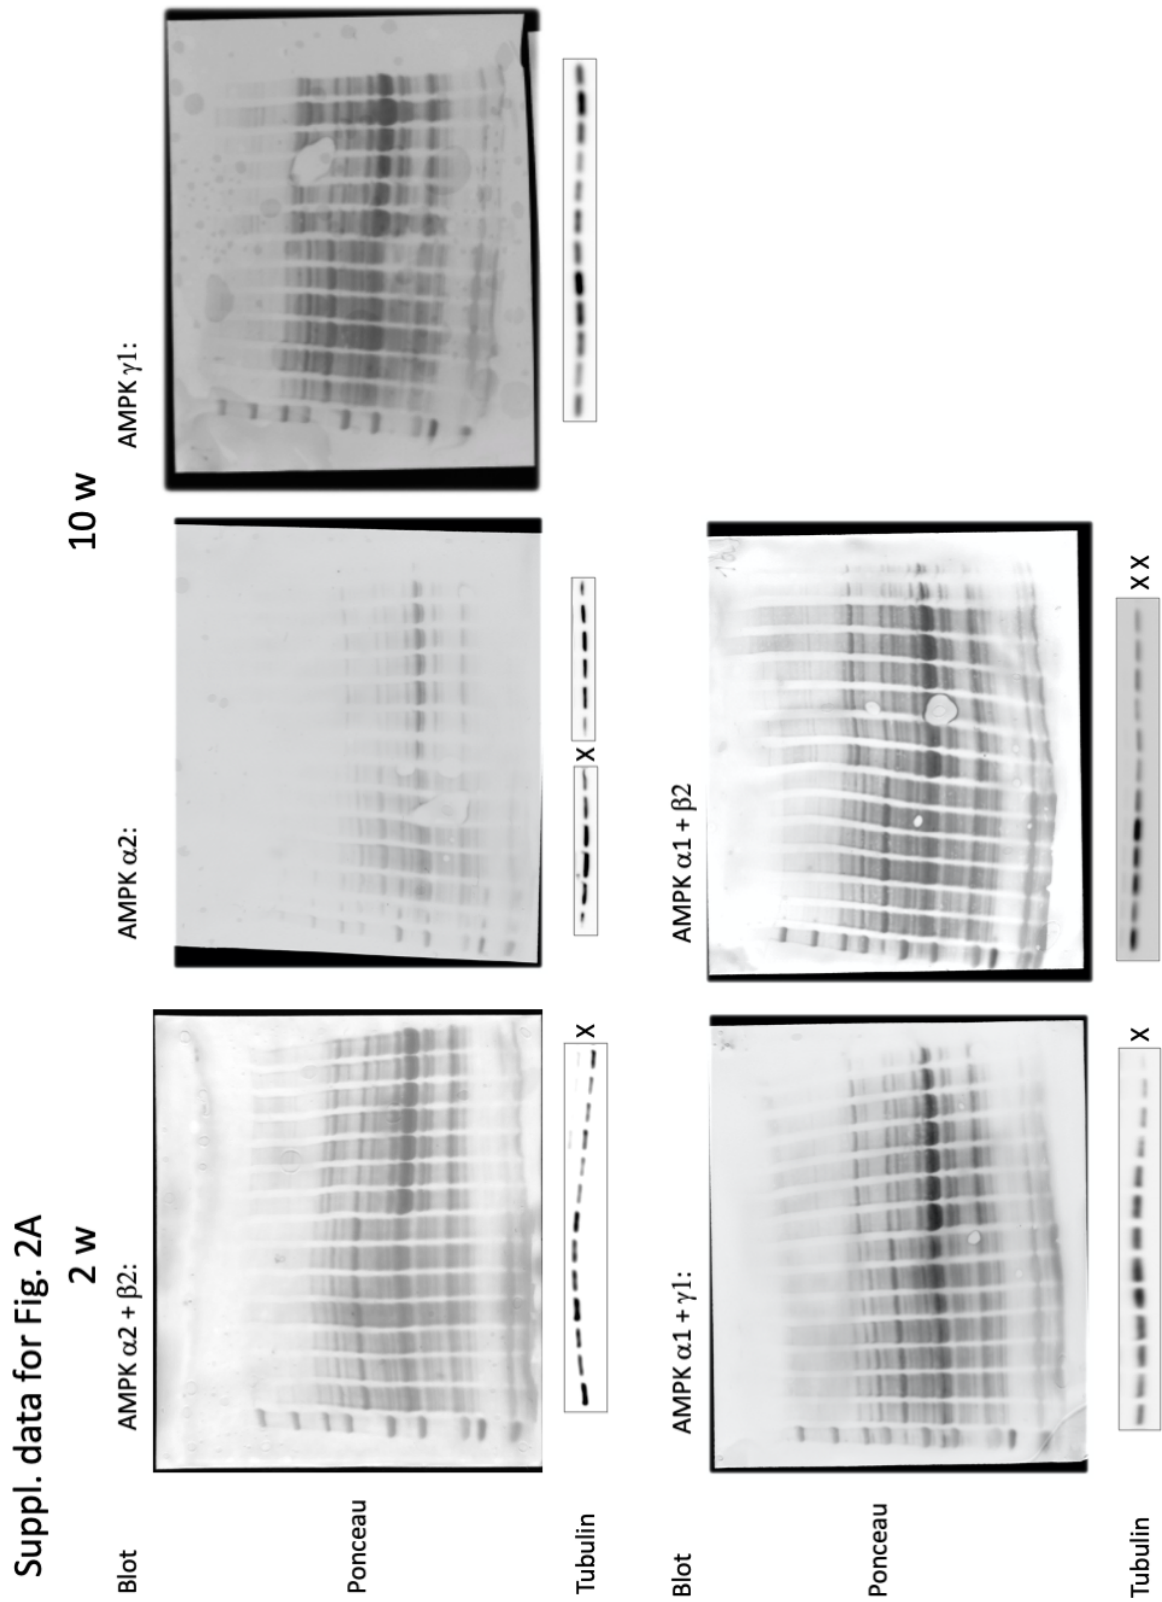

Suppl. data for Fig. 2A

52 w

Blot AMPK  $\alpha 2 + \beta 2$ :

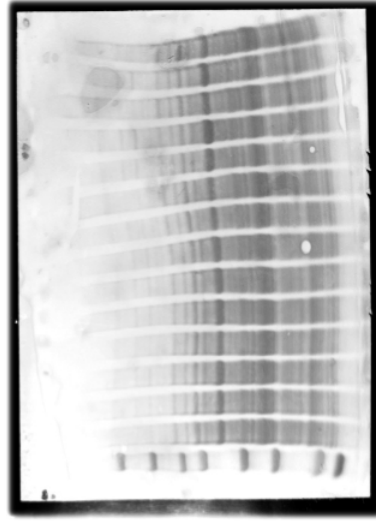

Ponceau

Tubulin

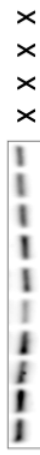

Blot AMPK  $\alpha 1 + \gamma 1$ :

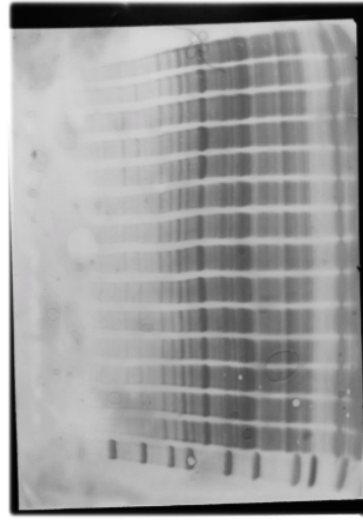

Ponceau

Tubulin

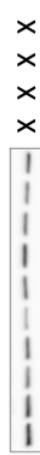

Suppl. data for Fig. 2B

Blot AMPK  $\alpha 2 + \beta 2$ :

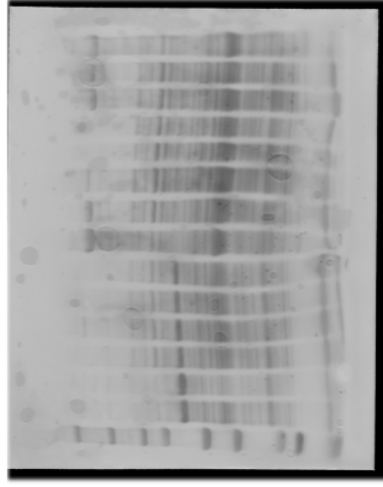

Ponceau

Tubulin

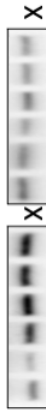

Blot AMPK  $\alpha 1 + \gamma 1$ :

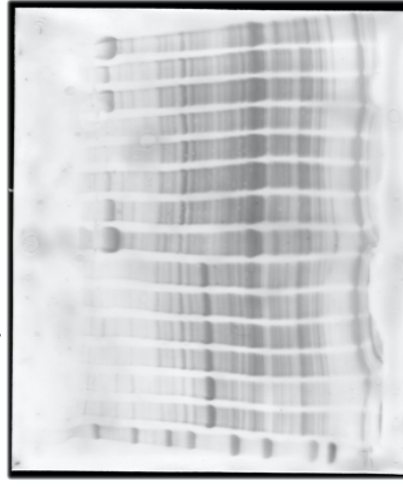

Ponceau

Tubulin

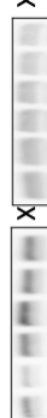

Suppl. data for Fig. 2D

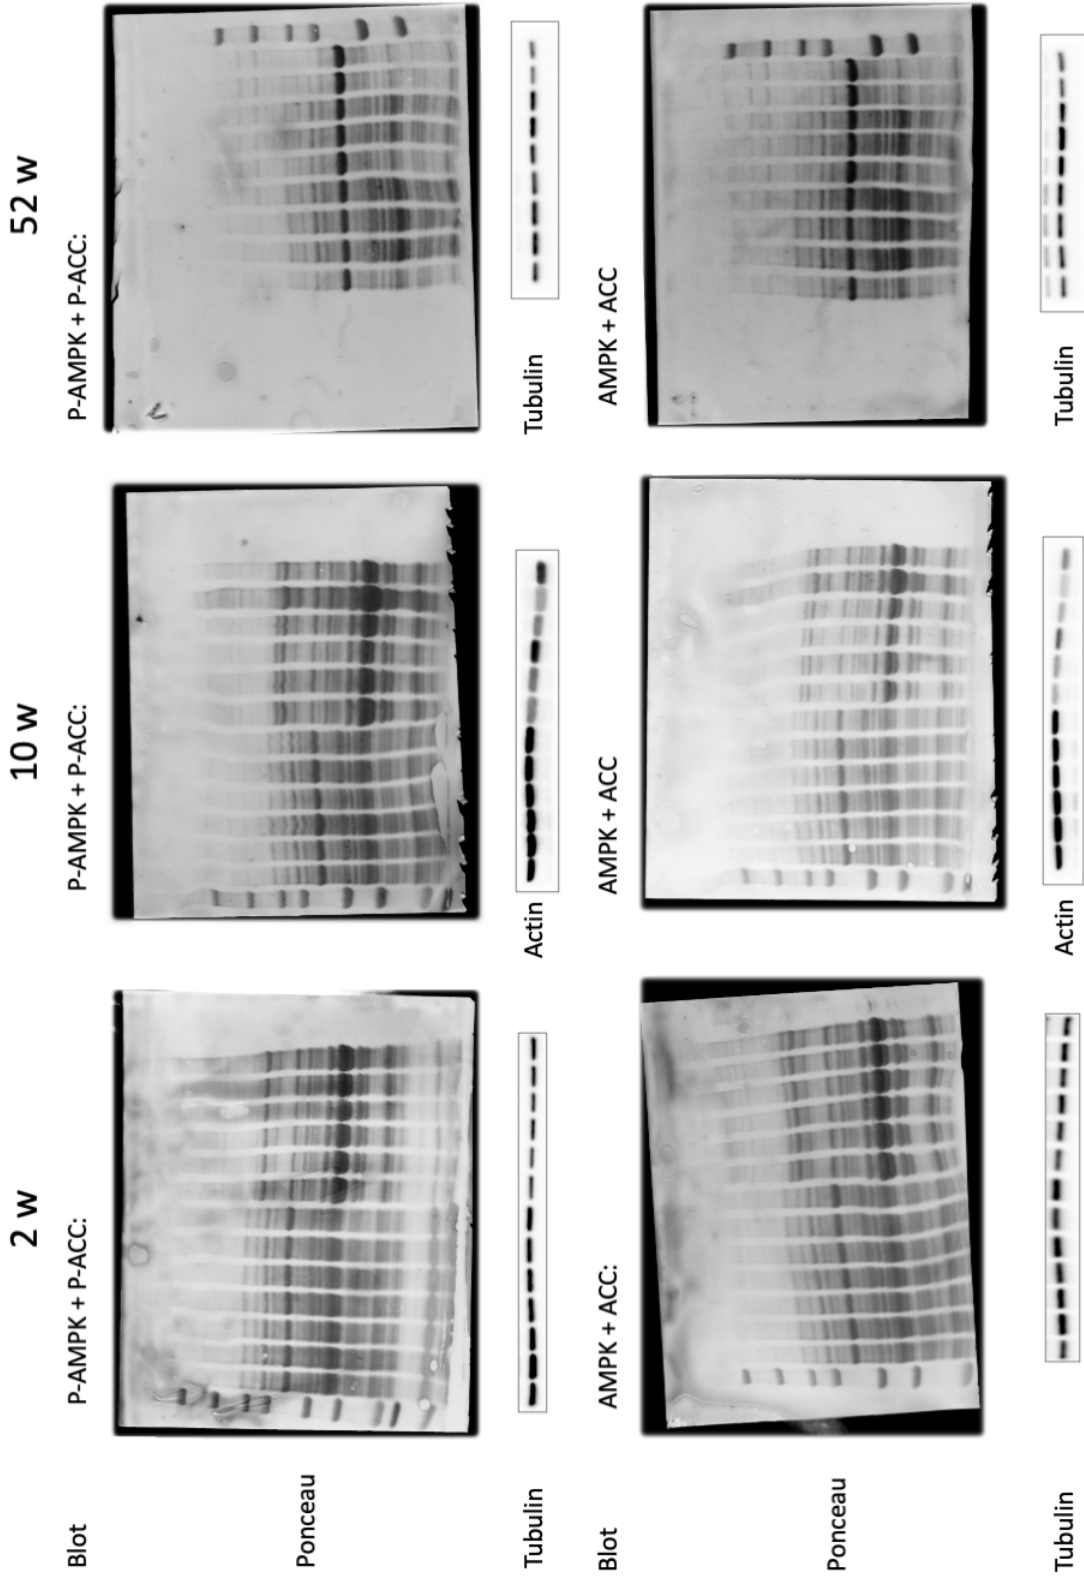

Supplement: Data_Sheet_1.pdf [file Data_Sheet_1.pdf]
